# Supplementary material for: A confined space pyrolysis strategy for controlling the structure of hollow mesoporous carbon spheres with high supercapacitor performance
Source: Royal Society of Chemistry journal article supplement (doi:10.1039/c8nr08784a), 2019-01-01
Supplement: c8nr08784a1.pdf [file c8nr08784a1.pdf]

**Supporting Information:**

**Confined space pyrolysis strategy for controlling the structure of hollow  
mesoporous carbon sphere with high supercapacitor performance**

*Juan Du, Lei Liu, Yifeng Yu, Yuming Qin, Haixia Wu, Aibing Chen\**

College of Chemical and Pharmaceutical Engineering, Hebei University of Science and  
Technology, 70 Yuhua Road, Shijiazhuang 050018, China.

\*Corresponding Author: E-mail: [chen\\_ab@163.com](mailto:chen_ab@163.com)

## Detail Experimental Section

### Synthesis of HMCS

The RF resins spheres was prepared by previous research.<sup>1</sup> Typically, monodisperse RF resins spheres were synthesized by using resorcinol and formaldehyde solution as precursors. Ammonia aqueous solution ( $\text{NH}_4\text{OH}$ , 0.1 mL, 25 wt%) was mixed with a solution containing absolute ethanol ( $\text{EtOH}$ , 4 mL) and deionized water ( $\text{H}_2\text{O}$ , 24 mL), then stirred for more than 1 h. Subsequently, resorcinol (0.2 g) was added and continually stirred for 30 mins. The formaldehyde solution (0.28 mL) then added to the reaction solution and stirred for corresponding time at 30 °C. To prepare RF/silica nanohybrids (named as  $\text{RF@SiO}_2$ ) nanoparticles, the above produced solution was added in to the mix solution of 50 mL  $\text{H}_2\text{O}$ , 20 mL  $\text{EtOH}$  and 1mL  $\text{NH}_4\text{OH}$  (25 wt%) followed by stirring about 5min. Then, 100  $\mu\text{L}$  of aminopropyl-ethoxysilane (APTES) was added and vigorously stirring (1 h). 1 mL of TEOS was then introduced into the above solution accompanying by stirring and reacted at 30 °C for overnight. The product of  $\text{RF@SiO}_2$  nanoparticles was collected using centrifugation (9500 rpm) and rinsed several times with ethanol and dried at room temperature. The as-prepared  $\text{RF@SiO}_{2-x}$  (where the  $x$  represents the RF polymerization time with 1, 6 and 12 h) nanoparticles were heated at 2 °C  $\text{min}^{-1}$  from room temperature to 800 °C and kept at this temperature for 3 h under a nitrogen flow to obtain  $\text{HMCS@SiO}_2$ . The pyrolysis product was treated with aqueous HF solution (10 wt.%) to remove the silica and generate  $\text{HMCS-}x$ . Under the same reaction conditions for synthesis of  $\text{RF@SiO}_{2-x}$  core-shell spheres to obtained  $\text{HMCS-}x$ , the RF polymerization time with 1, 6 and 12 h

in the synthesis of HMCS-1, HMCS-6 and HMCS-12, respectively.

In order to investigate the effect of compact silica shell in HMCS structure, the RF sphere prepared by polymerization time with 12 h was directly carbonized at 800 °C for 3 h under a nitrogen flow. After removing the silica shell, the solid carbon sphere was obtained (denoted as CS). Furtherly, the RF sphere prepared by polymerization time with 12 h and treated by hydrothermal process. Under the same reaction conditions with HMCS, the HMCS-H was prepared to investigate the affection of degree of polymerization for the cavity and porous structure. Under the same reaction conditions with HMCS, changing the adding TEOS amount with 0.5 and 2.0 ml, the HMCS-S@SiO<sub>2</sub> and HMCS-Y@SiO<sub>2</sub> were achieved and then corresponding HMCS-S and HMCS-Y were obtained respectively.

### **Characterizations.**

The morphology and microstructure of samples were investigated by transmission electron microscopy (TEM, JEOL JEM-2100). Nitrogen adsorption-desorption isotherms were carried out on a Micromeritics TriStar 3020 instrument at -196 °C. The Brunauer-Emmett-Teller (BET) method was employed to calculate the specific surface area, while the Barrett-Joyner-Halenda (BJH) method was applied to analyze the pore size distribution using the desorption branch of isotherm. The total pore volume was obtained from the amount of N<sub>2</sub> adsorbed at the relative pressure ( $P/P_0=0.97$ ).

### **Electrochemical Measurements**

The working electrode was prepared by coating the viscous slurry (samples, carbon black and polytetrafluoroethylene with the mass ratio of 8:1:1 in ethanol) onto Ni foam

current collector. The mass of active material loaded on each working electrode was 4~5 mg after drying at 100 °C for 24 h. Electrochemical measurements were carried out in both three-electrode and two-electrode system using an electrochemical workstation (CHI 760E, Chenhua Instruments, China) with 6 M KOH solution as the electrolyte. For three-electrode system, a Pt wire and Hg/HgO was used as the counter and reference electrodes. For the fabrication of supercapacitor devices, two work electrode were immersed in 6 M KOH and were separated by a filtration paper, then tested by the current collector. Electrochemical performances were evaluated by cyclic voltammetry (CV), galvanostatic charge-discharge (GCD) and electrical impedance spectroscopy (EIS) analysis. In three-electrode system, the specific gravimetric capacitance according to the GCD measurements:  $C=I\Delta t/\Delta Vm$ . For the two-electrode system, the specific capacitances ( $C$ , F g<sup>-1</sup>), energy density ( $E$ , Wh kg<sup>-1</sup>) and power density ( $P$ , W kg<sup>-1</sup>) were calculated by the following equations:  $C=4 I\Delta t/\Delta Vm$ ,  $E=0.5 C(\Delta V)^2$  and  $P=E/\Delta t$ , where  $I$  (A),  $\Delta t$  (s),  $\Delta V$  (V) and  $m$  (g) are GCD current, discharge time, voltage window, and mass of active material, respectively.

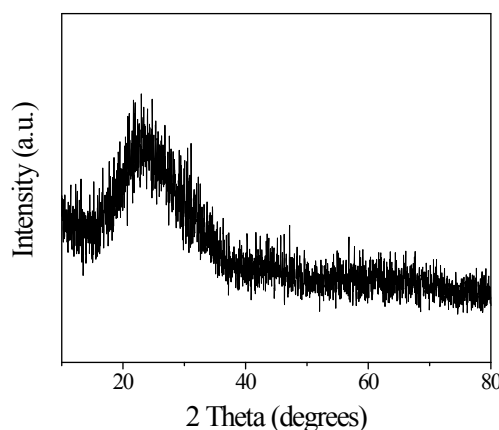

**Fig. S1.** XRD spectra of HMCS-Y.

**Table S1.** Comparison of the gravimetric capacitances for sample HMCS-12 with previous reported carbon spheres.

| Samples                                  | Morphology                                                                          | SSA<br>$\text{m}^2 \text{g}^{-1}$ | Electrolyte                 | $C_s$<br>$\text{F g}^{-1}$ | $I/m^a$<br>$\text{A g}^{-1}$ | Ref.      |
|------------------------------------------|-------------------------------------------------------------------------------------|-----------------------------------|-----------------------------|----------------------------|------------------------------|-----------|
| HMICS-12                                 | 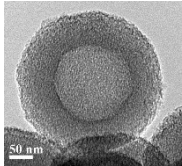   | 1425                              | 6 M KOH                     | 352                        | 0.5                          | This work |
| Carbon spheres                           | 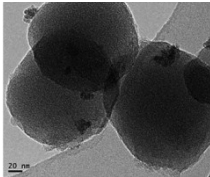   | 2502                              | 6 M KOH                     | 230                        | 1                            | 2         |
| Carbon spheres                           | 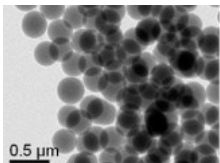   | 1184                              | 1 M $\text{H}_2\text{SO}_4$ | 388                        | 1                            | 3         |
| N-doped HCS                              | 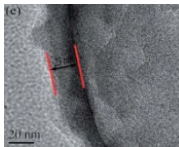  | 213                               | 6 M KOH                     | 213                        | 0.5                          | 4         |
| Core-shell HCS                           | 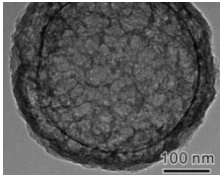 | 1286                              | 1 M KOH                     | 210                        | 1                            | 5         |
| Composite of graphene and carbon spheres | 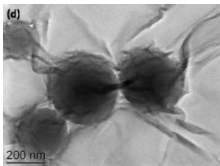 | 677                               | 1 M NaCl                    | 289                        | 0.5                          | 6         |
| Carbon spheres                           | 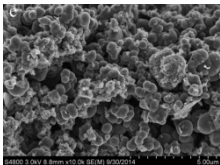 | 403                               | 6 M KOH                     | 228                        | 1                            | 7         |
| Carbon spheres                           | 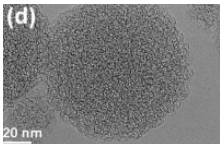 | 1576                              | 1 M $\text{H}_2\text{SO}_4$ | 154                        | 2 <sup>c,d</sup>             | 8         |
| Carbon spheres                           | 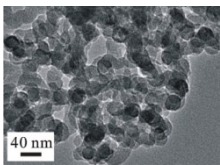 | 1439                              | 6 M KOH                     | 269                        | 1                            | 9         |

|                |                                                                                     |      |                                     |     |                |    |
|----------------|-------------------------------------------------------------------------------------|------|-------------------------------------|-----|----------------|----|
| Carbon spheres | 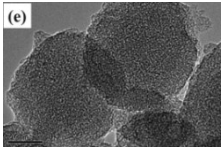   | 735  | 6 M KOH                             | 182 | 0.5            | 10 |
| Carbon spheres | 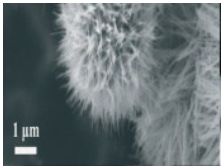   | NA   | 1 M Na <sub>2</sub> SO <sub>4</sub> | 225 | 2 <sup>c</sup> | 11 |
| Carbon spheres | 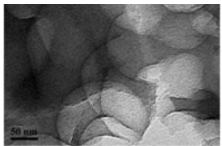   | 2823 | 6 M KOH                             | 316 | 0.2            | 12 |
| Carbon spheres | 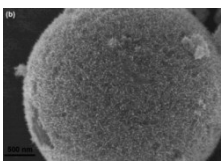   | 2440 | 6 M KOH                             | 231 | 1              | 13 |
| Carbon spheres | 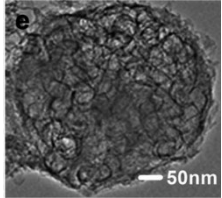  | 687  | 6 M KOH                             | 268 | 1              | 14 |
| HCS            | 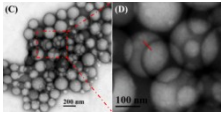 | 331  | 6 M KOH                             | 266 | 1              | 15 |
| Carbon spheres | 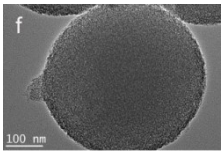 | 1291 | 6 M KOH                             | 274 | 0.5            | 16 |
| Carbon spheres | 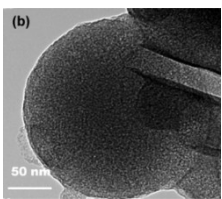 | 1519 | 6 M KOH                             | 371 | 0.5            | 17 |
| HCS            | 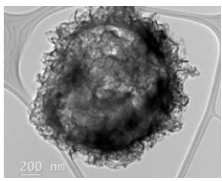 | NA   | 3 M KOH                             | 318 | 0.5            | 18 |
| Carbon spheres | 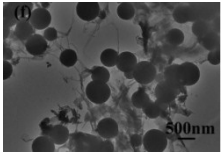 | NA   | 2 M H <sub>2</sub> SO <sub>4</sub>  | 315 | 1              | 19 |

|                |                                                                                   |      |         |     |     |    |
|----------------|-----------------------------------------------------------------------------------|------|---------|-----|-----|----|
| Carbon spheres | 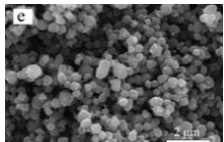 | 1200 | 6 M KOH | 356 | 0.2 | 20 |
|----------------|-----------------------------------------------------------------------------------|------|---------|-----|-----|----|

a: current density; b: active samples; c:  $\text{mV s}^{-1}$ ; d: two-electrode system; NA: not available.

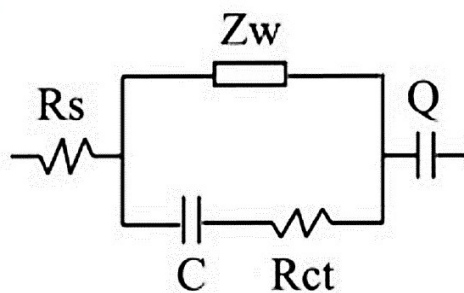

**Fig. S2.** The fitting equivalent circuit model of EIS.

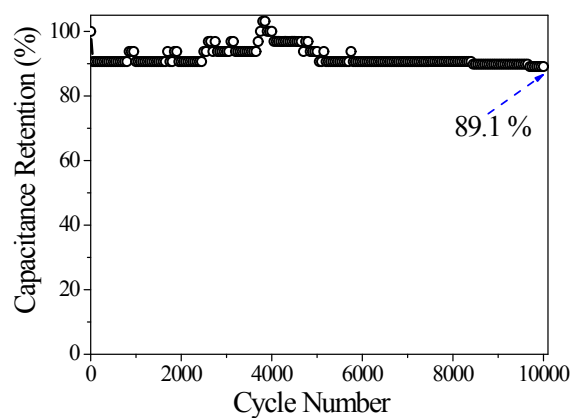

**Fig. S3.** Cycling stability of HMCS-12 over 10000 cycles.

**Table S2.** Comparison of the energy density for sample HMCS-12 with previous reported carbon materials.

| Samples                                                    | Electrolyte                        | Energy Density<br>Wh Kg <sup>-1</sup> | Power Density<br>W Kg <sup>-1</sup> |
|------------------------------------------------------------|------------------------------------|---------------------------------------|-------------------------------------|
| HMCS-12                                                    | 6 M KOH                            | 26.3                                  | 1264.1                              |
| hierarchical porous carbon<br>nanosheets                   | 6 M KOH                            | 22.8                                  | 198.8                               |
| Phosphorus, Nitrogen and Oxygen<br>co-doped carbon spheres | 1 M H <sub>2</sub> SO <sub>4</sub> | 10.0                                  | 750.0                               |
| Phosphorus-doped 3D hierarchical<br>porous carbon          | 6 M KOH                            | 8.5                                   | 100.0                               |
| Graphene-like porous carbon<br>nanosheets                  | 6 M KOH                            | 20.9/12.1                             | 467/34500                           |
| Heteroatom-doped porous carbon                             | 6 M KOH                            | 21.4                                  | 700                                 |
| carbon spheres                                             | 6 M KOH                            | 10.7                                  | 151.8                               |
| microporous carbon spheres                                 | 1 M NaCl                           | 13.9                                  | 125                                 |
| Sulfur-doped nanoporous carbon<br>spheres                  | 6 M KOH                            | 24/11.6                               | 45/5000                             |

## References

1. Liu, J.; Qiao, S. Z.; Liu, H.; Chen, J.; Orpe, A.; Zhao, D.; Lu, G. Q., Extension of the Stober method to the preparation of monodisperse resorcinol-formaldehyde resin polymer and carbon spheres. *Angew. Chem. Int. Ed.* **2011**, 50, (26), 5947-51.
2. Fan, Y.; Yang, X.; Zhu, B.; Liu, P.-F.; Lu, H.-T., Micro-mesoporous carbon spheres derived from carrageenan as electrode material for supercapacitors. *J. Power Sources* **2014**, 268, 584-590.
3. Wickramaratne, N. P.; Xu, J.; Wang, M.; Zhu, L.; Dai, L.; Jaroniec, M., Nitrogen Enriched Porous Carbon Spheres: Attractive Materials for Supercapacitor Electrodes and CO<sub>2</sub> Adsorption. *Chemistry of Materials* **2014**, 26, (9), 2820-2828.
4. Han, J.; Xu, G.; Ding, B.; Pan, J.; Dou, H.; MacFarlane, D. R., Porous nitrogen-

doped hollow carbon spheres derived from polyaniline for high performance supercapacitors. *J. Mater. Chem. A* **2014**, 2, (15), 5352-5357.

5. Fang, X.; Zang, J.; Wang, X.; Zheng, M.-S.; Zheng, N., A multiple coating route to hollow carbon spheres with foam-like shells and their applications in supercapacitor and confined catalysis. *J. Mater. Chem. A* **2014**, 2, (17), 6191-6197.

6. Xu, X.; Liu, Y.; Wang, M.; Zhu, C.; Lu, T.; Zhao, R.; Pan, L., Hierarchical hybrids with microporous carbon spheres decorated three-dimensional graphene frameworks for capacitive applications in supercapacitor and deionization. *Electrochim. Acta* **2016**, 193, 88-95.

7. Zhu, D.; Wang, Y.; Gan, L.; Liu, M.; Cheng, K.; Zhao, Y.; Deng, X.; Sun, D., Nitrogen-containing carbon microspheres for supercapacitor electrodes. *Electrochim. Acta* **2015**, 158, 166-174.

8. Zhang, C.; Hatzell, K. B.; Boota, M.; Dyatkin, B.; Beidaghi, M.; Long, D.; Qiao, W.; Kumbur, E. C.; Gogotsi, Y., Highly porous carbon spheres for electrochemical capacitors and capacitive flowable suspension electrodes. *Carbon* **2014**, 77, 155-164.

9. Lu, W.; Liu, M.; Miao, L.; Zhu, D.; Wang, X.; Duan, H.; Wang, Z.; Li, L.; Xu, Z.; Gan, L.; Chen, L., Nitrogen-containing ultramicroporous carbon nanospheres for high performance supercapacitor electrodes. *Electrochimica Acta* **2016**, 205, 132-141.

10. Yang, W.; Feng, Y.; Xiao, D.; Yuan, H., Fabrication of microporous and mesoporous carbon spheres for high-performance supercapacitor electrode materials. *International Journal of Energy Research* **2015**, 39, (6), 805-811.

11. Zhang, X.; Ma, J.; Yang, W.; Gao, Z.; Wang, J.; Liu, Q.; Liu, J.; Jing, X.,

Manganese dioxide core-shell nanowires in situ grown on carbon spheres for supercapacitor application. *CrystEngComm* **2014**, 16, (19), 4016.

12. Mao, L.; Zhang, Y.; Hu, Y.; Ho, K. H.; Ke, Q.; Liu, H.; Hu, Z.; Zhao, D.; Wang, J., Activation of sucrose-derived carbon spheres for high-performance supercapacitor electrodes. *RSC Adv.* **2015**, 5, (12), 9307-9313.

13. Fan, Y.; Liu, P.-F.; Yang, Z.-J.; Jiang, T.-W.; Yao, K.-L.; Han, R.; Huo, X.-X.; Xiong, Y.-Y., Bi-functional porous carbon spheres derived from pectin as electrode material for supercapacitors and support material for Pt nanowires towards electrocatalytic methanol and ethanol oxidation. *Electrochim. Acta* **2015**, 163, 140-148.

14. Ma, X.; Gan, L.; Liu, M.; Tripathi, P. K.; Zhao, Y.; Xu, Z.; Zhu, D.; Chen, L., Mesoporous size controllable carbon microspheres and their electrochemical performances for supercapacitor electrodes. *J. Mater. Chem. A* **2014**, 2, (22), 8407-8415.

15. Sun, H.; Zhu, Y.; Yang, B.; Wang, Y.; Wu, Y.; Du, J., Template-free fabrication of nitrogen-doped hollow carbon spheres for high-performance supercapacitors based on a scalable homopolymer vesicle. *J. Mater. Chem. A* **2016**, 4, (31), 12088-12097.

16. Chang, B.; Zhang, S.; Yin, H.; Yang, B., Convenient and large-scale synthesis of nitrogen-rich hierarchical porous carbon spheres for supercapacitors and CO<sub>2</sub> capture. *Appl. Surf. Sci.* **2017**, 412, 606-615.

17. Sun, F.; Wu, H.; Liu, X.; Liu, F.; Zhou, H.; Gao, J.; Lu, Y., Nitrogen-rich carbon spheres made by a continuous spraying process for high-performance supercapacitors. *Nano Research* **2016**, 9, (11), 3209-3221.

18. Lin, T.-W.; Hsiao, M.-C.; Wang, A.-Y.; Lin, J.-Y., Hollow Hierarchical Carbon Spheres Decorated with Ultrathin Molybdenum Disulfide Nanosheets as High-Capacity Electrode Materials for Asymmetric Supercapacitors. *ChemElectroChem* **2017**, 4, (3), 620-627.
19. Li, M.; Xiang, S.; Chang, X.; Chang, C., Resorcinol-formaldehyde carbon spheres/polyaniline composite with excellent electrochemical performance for supercapacitors. *J. Solid State Electrochem.* **2016**, 21, (2), 485-494.
20. Wang, Z.; Sun, L.; Xu, F.; Peng, X.; Zou, Y.; Chu, H.; Ouyang, L.; Zhu, M., Synthesis of N-doped hierarchical carbon spheres for CO<sub>2</sub> capture and supercapacitors. *RSC Advances* **2016**, 6, (2), 1422-1427.
